# Supplementary material for: Gender-Specific Expression of Ubiquitin-Specific Peptidase 9 Modulates Tau Expression and Phosphorylation: Possible Implications for Tauopathies
Source: PubMed Central journal article supplement (PMC5684262; doi:10.1007/s12035-016-0299-z), 2016-11-23
Supplement: 12035_2016_299_MOESM1_ESM.pdf [file 12035_2016_299_MOESM1_ESM.pdf]

## **Supplementary Materials** for “Gender-specific expression of ubiquitin-specific peptidase 9 modulates tau expression and phosphorylation: possible implications for tauopathies”

Sandra Köglsberger, Maria Lorena Cordero-Maldonado, Paul Antony, Julia Ilona Forster, Pierre Garcia, Manuel Buttini, Alexander Crawford, Enrico Glaab<sup>†</sup>

*Luxembourg Centre for Systems Biomedicine (LCSB), University of Luxembourg, 7 avenue des Hauts Fourneaux, L-4362 Esch-sur-Alzette, Luxembourg*

<sup>†</sup>Corresponding author: [enrico.glaab@uni.lu](mailto:enrico.glaab@uni.lu), T: +352 466644 6186, Fax: +352 466644 6949

|    |           |      |
|----|-----------|------|
| 1. | Table S1  | p. 2 |
| 2. | Table S2  | p. 3 |
| 3. | Table S3  | p. 4 |
| 4. | Table S4  | p. 4 |
| 5. | Table S5  | p. 5 |
| 6. | Table S6  | p. 5 |
| 6. | Figure S1 | p. 6 |
| 7. | Figure S2 | p. 7 |
| 8. | Figure S3 | p. 8 |

| Knockdown target | Measured gene | Min. p-value | Max. p-value | Min. log. fold change | Max. log fold change |
|------------------|---------------|--------------|--------------|-----------------------|----------------------|
| USP9XY           | USP9X         | 1.72E-07     | 9.98E-03     | -4.19                 | -1.22                |
|                  | USP9Y         | 5.22E-05     | 3.95E-02     | -2.23                 | -0.84                |
|                  | MAPT          | 0.017        | 0.38         | -1.24                 | -0.5                 |
|                  | BACH1         | 0.025        | 0.87         | 0.06                  | 0.72                 |
| USP9X            | USP9X         | 0.009        | 0.87         | -1.42                 | -0.11                |
|                  | MAPT          | 0.032        | 0.44         | -1.26                 | -0.27                |
|                  | BACH1         | 0.0054       | 0.30         | 0.48                  | 0.84                 |

**Tab. S1** Differential expression statistics under different knockdown experiments (USP9XY and USP9X, both as compared to controls) and for the main genes discussed in the manuscript and measured in the transcriptomics data for DU145 cells. The statistics correspond to the maximum and minimum p-values and log transformed fold changes obtained with the empirical Bayes moderated t-statistic across the pre-filtered genetic probes for the assessed genes (the pre-filtering removed all probes with an average expression below the overall average expression in the transcriptome dataset).

a)

| Primer pairs                                                                                                 | Sequence (5' → 3')       | Start | Stop     | Tm        | GC%       | Self complementarity | Self 3' complementarity |
|--------------------------------------------------------------------------------------------------------------|--------------------------|-------|----------|-----------|-----------|----------------------|-------------------------|
| *Forward 1                                                                                                   | ACCAACCCCACTGTA<br>AGTT  | 532   | 551      | 59.9<br>7 | 50.0<br>0 | 4.00                 | 3.00                    |
| *Reverse 1                                                                                                   | AATCCACCAACCAACC<br>CTTG | 670   | 651      | 59.4<br>6 | 50.0<br>0 | 3.00                 | 3.00                    |
| <b>Product length: 139 bp</b>                                                                                |                          |       |          |           |           |                      |                         |
| Forward 2                                                                                                    | AGCCTTCATCAGCCAC<br>AGTA | 1207  | 122<br>6 | 59.9<br>0 | 50.0<br>0 | 3.00                 | 2.00                    |
| Reverse 2                                                                                                    | CCTCATGTTTCCCAGC<br>CTGA | 1330  | 131<br>1 | 60.8<br>5 | 55.0<br>0 | 5.00                 | 3.00                    |
| <b>Product length: 124 bp</b>                                                                                |                          |       |          |           |           |                      |                         |
| Forward 3                                                                                                    | TGACGGAGAACGGGAT<br>GAAA | 2195  | 221<br>4 | 60.1<br>9 | 50.0<br>0 | 2.00                 | 0.00                    |
| Reverse 3                                                                                                    | AATCACAACCCTCCAC<br>AGGT | 2337  | 231<br>8 | 60.0<br>4 | 50.0<br>0 | 3.00                 | 2.00                    |
| <b>Product length: 143 bp</b>                                                                                |                          |       |          |           |           |                      |                         |
| <b><i>mapt a</i> (XM_001340530.4): <i>Danio rerio</i> microtubule-associated protein tau a mRNA, 2276 bp</b> |                          |       |          |           |           |                      |                         |
| Primer pairs                                                                                                 | Sequence (5' → 3')       | Start | Stop     | Tm        | GC%       | Self complementarity | Self 3' complementarity |
| *Forward 1                                                                                                   | CGCACAGTATCCTCGT<br>TTGG | 68    | 87       | 60.1<br>2 | 55.0<br>0 | 4.0                  | 0.00                    |
| *Reverse 1                                                                                                   | CCAGAGAGGGAAGAA<br>GCCAT | 177   | 158      | 59.9<br>7 | 55.0<br>0 | 2.00                 | 2.00                    |
| <b>Product length: 110 bp</b>                                                                                |                          |       |          |           |           |                      |                         |
| Forward 2                                                                                                    | ATGGCTTCTCCCTCT<br>CTGG  | 158   | 177      | 59.9<br>7 | 55.0<br>0 | 2.00                 | 0.00                    |
| Reverse 2                                                                                                    | CTTGGATTGAGCTGTG<br>GGTG | 277   | 258      | 59.9<br>8 | 55.0<br>0 | 4.00                 | 0.00                    |
| <b>Product length: 120 bp</b>                                                                                |                          |       |          |           |           |                      |                         |
| Forward 3                                                                                                    | TCACAAACCAGGTGGA<br>GGAA | 1201  | 122<br>0 | 59.9<br>7 | 50.0<br>0 | 5.00                 | 0.00                    |
| Reverse 3                                                                                                    | ACGGAACGTCAGTTTG<br>TGTG | 1345  | 132<br>6 | 60.1<br>2 | 50.0<br>0 | 4.00                 | 0.00                    |
| <b>Product length: 145 bp</b>                                                                                |                          |       |          |           |           |                      |                         |
| <b><i>mapt b</i> (XM_002661150.3): <i>Danio rerio</i> microtubule-associated protein tau b mRNA, 1312 bp</b> |                          |       |          |           |           |                      |                         |
| *Forward 1                                                                                                   | GCTCCAAGGCCAACAT<br>TCAT | 928   | 947      | 59.9<br>7 | 50.0<br>0 | 4.00                 | 2.00                    |
| *Reverse 1                                                                                                   | TGTGGCTCTCAATCCT<br>CCTC | 1077  | 105<br>8 | 59.9<br>7 | 55.0<br>0 | 2.00                 | 0.00                    |
| <b>Product length: 150 bp</b>                                                                                |                          |       |          |           |           |                      |                         |
| Forward 2                                                                                                    | ACCTAAGCAACGTCCA<br>GTCA | 901   | 920      | 60.1<br>2 | 50.0<br>0 | 4.00                 | 1.00                    |
| Reverse 2                                                                                                    | TGTGGCTCTCAATCCT<br>CCTC | 1077  | 105<br>8 | 59.9<br>7 | 55.0<br>0 | 2.00                 | 0.00                    |
| <b>Product length: 177 bp</b>                                                                                |                          |       |          |           |           |                      |                         |
| Forward 3                                                                                                    | GAGGAGGATTGAGAG<br>CCACA | 1058  | 107<br>7 | 59.9<br>7 | 55.0<br>0 | 2.00                 | 2.00                    |
| Reverse 3                                                                                                    | GGAAATGTCAGGGGAC<br>TTGC | 1154  | 113<br>5 | 59.9<br>8 | 55.0<br>0 | 4.00                 | 2.00                    |
| <b>Product length: 97 bp</b>                                                                                 |                          |       |          |           |           |                      |                         |

b)

| <b>House keeping: <i>β-actin1</i> (NM_131031.1): <i>Danio rerio</i> beta-actin 1 mRNA, 1700 bp</b> |                      |       |      |       |       |                      |                         |
|----------------------------------------------------------------------------------------------------|----------------------|-------|------|-------|-------|----------------------|-------------------------|
| Primer pair                                                                                        | Sequence (5' → 3')   | Start | Stop | Tm    | GC%   | Self complementarity | Self 3' complementarity |
| Forward                                                                                            | CGAGCAGGAGATGGGAACC  | 722   | 740  | 61.00 | 63.16 | 2.00                 | 2.00                    |
| Reverse                                                                                            | CAACGGAAACGCTCATTGC  | 823   | 805  | 59.38 | 52.63 | 3.00                 | 2.00                    |
| <b>Product length: 102 bp</b>                                                                      |                      |       |      |       |       |                      |                         |
| <b>House keeping: <i>Ef1a</i> (NM_131263.1): <i>Danio rerio</i> elongation factor 1a mRNA,</b>     |                      |       |      |       |       |                      |                         |
| Forward                                                                                            | CTGGAGGCCAGCTCAAACAT | 678   | 697  | 61.49 | 55.00 | 5.00                 | 2.00                    |

|                                                                                                                |                               |     |     |       |       |      |      |
|----------------------------------------------------------------------------------------------------------------|-------------------------------|-----|-----|-------|-------|------|------|
| Reverse                                                                                                        | ATCAAGAAGAGTAGTACCGCTAGCATTAC | 764 | 736 | 63.62 | 41.38 | 8.00 | 8.00 |
| <b>Product length: 87 bp</b>                                                                                   |                               |     |     |       |       |      |      |
| <b>House keeping: <i>Rpl13-α</i> (NM_212784.1): <i>Danio rerio</i> ribosomal protein L13alpha mRNA, 819 bp</b> |                               |     |     |       |       |      |      |
| Forward                                                                                                        | TCTGGAGGACTGTAAGAGGTATGC      | 348 | 371 | 62.37 | 50.00 | 3.00 | 2.00 |
| Reverse                                                                                                        | AGACGCACAATCTTGAGAGCAG        | 495 | 474 | 62.08 | 50.00 | 4.00 | 1.00 |
| <b>Product length: 148 bp</b>                                                                                  |                               |     |     |       |       |      |      |

**Tab. S2** a) Assay primer pair design for the zebrafish genes *usp9*, *mapta* and *maptb*. After designing several primer pairs for each target gene using the NCBI Primer-BLAST tool, three different pairs of primers were selected and initially tested for specificity (by qualitative PCR) and efficiency (by quantitative PCR). All primer pairs tested displayed sufficient specificity and efficiency. Here, only the most specific and efficient pair (highlighted by the star symbol: \*) was used for further experiments. b) Three zebrafish house keeping genes (*β-actin1*, *elongation factor 1* and *60S ribosomal protein L13*) were processed in parallel in all experiments.

| Primer   | Name                | Sequence                   | Target |
|----------|---------------------|----------------------------|--------|
| Yifor1   | 667_Usp9Yi_for1     | CTGGGCAGCTTATGAATTGT       | USP9Y  |
| Yirev1   | 668_Usp9Yi_rev1     | CCTCAAATATGATTTTCTTCACC    | USP9Y  |
| Xifor1   | 669a_Usp9Xi_for1a   | TGTTAATTCTTTGCCACTGGAGTC   | USP9X  |
| Xifor2   | 669b_Usp9Xi_for1b   | TAATTCTTTGCCACTGGAGTC      | USP9X  |
| Xirev2   | 670_Usp9Xi_rev1     | CTTCTCGGACAACCTGCTGTCA     | USP9X  |
| XYfor1   | 671_Usp9XY_for1     | GAACTTCTCTGGCAGGTTGC       | USP9XY |
| XYrev1a  | 672a_Usp9XY_rev1a   | CTGAGGATTGCCAGTATATGGTCTTC | USP9XY |
| XYrev1b  | 672b_Usp9XY_rev1b   | CTGAGGATTGCCAGTATATGGTC    | USP9XY |
| XUfor1   | 673_Usp9X_3utr_for1 | AAAGAAACAGCCCCAGAAT        | USP9X  |
| XUrev1   | 674_Usp9X_3utr_rev1 | AGGGCTTAGAACAGCAGCA        | USP9X  |
| XUfor2   | 675_Usp9X_3utr_for2 | AAGGGCTTTTGCCCTATTGT       | USP9X  |
| XUrev2   | 676_Usp9X_3utr_rev2 | AAAGACACAAGGCTGGGAAA       | USP9X  |
| MAPTfor  | 049_MAPT_for        | AAGGGGGCTGATGGTAAAAC       | MAPT   |
| MAPTrev  | 050_MAPT_rev        | CAGAGCTGGGTGGTGTCTTT       | MAPT   |
| SIRT1for | 591_hSIRT1_for      | TCAGTGGCTGGAACAGTGAG       | SIRT1  |
| SIRT1rev | 592_hSIRT1_rev      | TCTGGCATGTCCCACTATCA       | SIRT1  |

**Tab. S3** Primers tested for the knockdown experiments in the DU145 cell culture model

| Step                 | time [s] | temperature | cycles |
|----------------------|----------|-------------|--------|
| Initial denaturation | 120      | 95          | 1      |
| Denaturation         | 15       | 95          |        |
| Annealing            | 30       | 60          | 45     |
| Elongation           | 60       | 68          |        |
| Final elongation     | 300      | 68          | 1      |

**Tab. S4** PCR program used for the DU145 cell culture model PCR analyses

| Description | ID  | Hairpin sequence                                                       |
|-------------|-----|------------------------------------------------------------------------|
| Usp9XY      | 679 | AAAAAGAGTGGCTGGAAGTTTGAAATTCCTTGAAATTTCAAACCTCCAGCCACTC                |
| Usp9X       | 688 | AAAAAGCACTTTCCTCCAATTTATAGGTGTAATCCTTGAATTACACCTATAAAATTTGGAGGGAAAGTGC |
| scrambled   | 690 | AAAAAGGCAGGAGTATTCGACAGTAATCCTTGAATTACTGTCGAATACTCCTGCC                |
| scrambled   | 691 | AAAAAGGATCAAACAAGTGCAATAGTTCTTGAACCTATTGCATTGTTTGATCC                  |
| scrambled   | 692 | AAAAAGAGTTCTAACCGCTTATATATTCTTGAATATATAAGCGGTTAGAACTC                  |

**Tab. S5** Hairpin sequences for knockdown experiments in the DU145 cell culture model

| Assay ID      | Catalog Number | Gene Symbol | Gene Name                                                               |
|---------------|----------------|-------------|-------------------------------------------------------------------------|
| Hs01126048_mH | 4351372        | USP9X       | hCG18381 Celera Annotation;ubiquitin specific peptidase 9; X-linked     |
| Hs01079350_mH | 4351372        | USP9Y       | ubiquitin specific peptidase 9; Y-linked;hCG15064 Celera Annotation     |
| Hs00902194_m1 | 4331182        | MAPT        | microtubule-associated protein tau;hCG27664 Celera Annotation           |
| Hs03044880_gH | 4331182        | HSPA8       | hCG2032950 Celera Annotation;heat shock 70kDa protein 8                 |
| Hs99999904_m1 | 4331182        | PPIA        | peptidylprolyl isomerase A (cyclophilin A);hCG2014648 Celera Annotation |

**Tab. S6** Assay IDs and catalog numbers for the TaqMan® gene expression assays used for the target and reference genes assessed by RT-PCR with the Fluidigm 48.48 integrated fluidic circuit platform for the DU145 cell culture experiments.

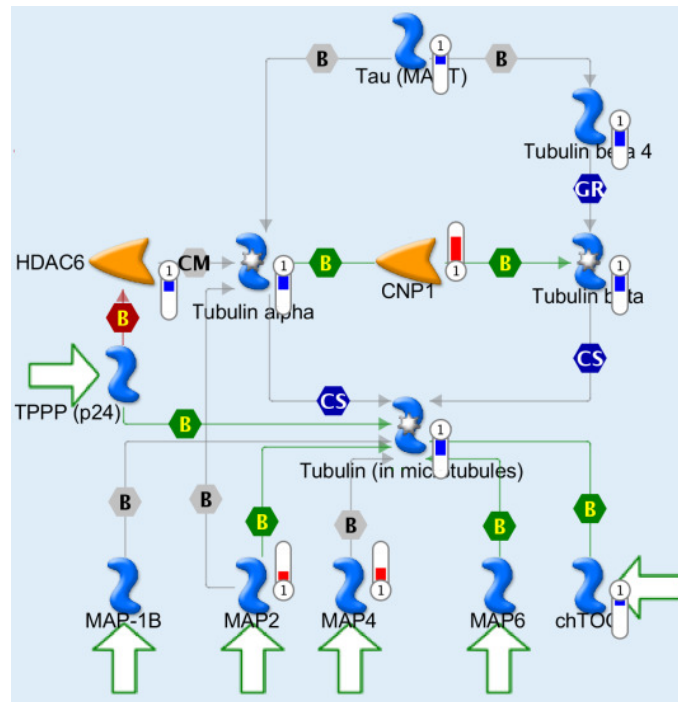

**Fig. S1** Molecular sub-network for the pathway “Regulation of cytoskeleton proteins in oligodendrocyte differentiation and myelination” (from GeneGO) showing a consistent under-expression of tubulins and the microtubule-associated protein tau (MAPT) in the USP9XY and USP9X knockdowns (under-expressed genes are highlighted by blue vertical bars, over-expressed genes by red vertical bars; physical interactions represented by arrows are labeled as follows: B = general binding interaction, CS = protein complex subunit interaction, GR = interaction between groups of related biomolecules; activating interactions are highlighted in green, inhibiting interactions in red, and interactions with unspecified/unknown effects are colored in gray; white arrows with green border indicate starting points of signaling paths).

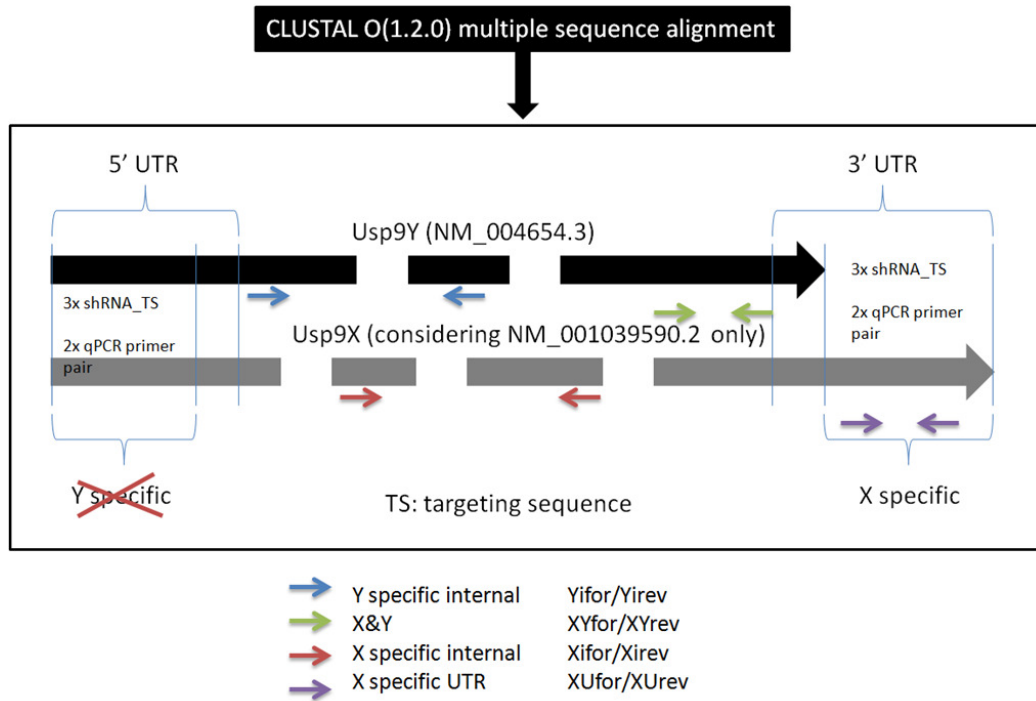

**Fig. S2** Primer design scheme for the human genes USP9X and USP9Y for the DU145 cell culture experiments.

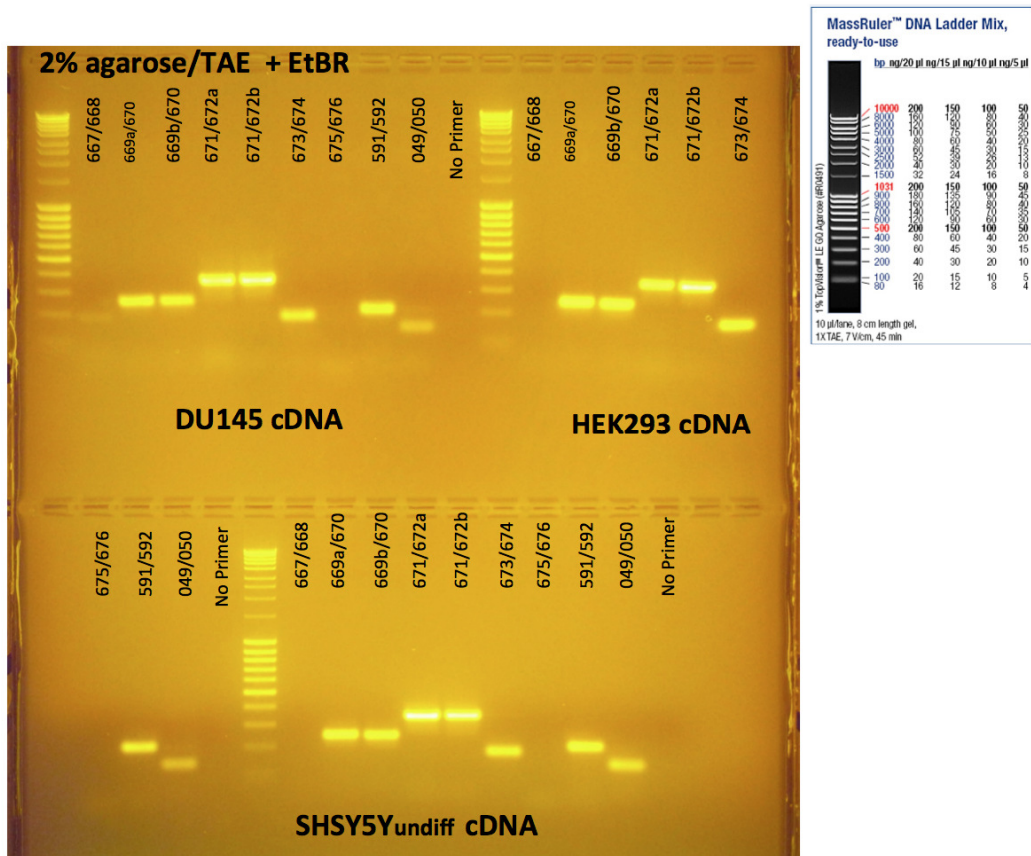

**Fig. S3** Agarose gel electrophoresis results for testing primers in different cell cultures (see also the corresponding primer sequences in Suppl. Table S3, the PCR program in Suppl. Table S4, and the primer design scheme in Suppl. Fig. S2). PCR reactions in the three cell lines DU145, HEK293 and SHSY5Y are compared. As expected, USP9Y (primer pair 667/668) was detectable in the male cell line DU145 but not in the female cell lines HEK293 and SHSY5Y.
